# Supplementary material
Source: PubMed Central journal article supplement (PMC7680348)
Supplement: NIHMS1618252-supplement-supplementary.pdf [file NIHMS1618252-supplement-supplementary.pdf]

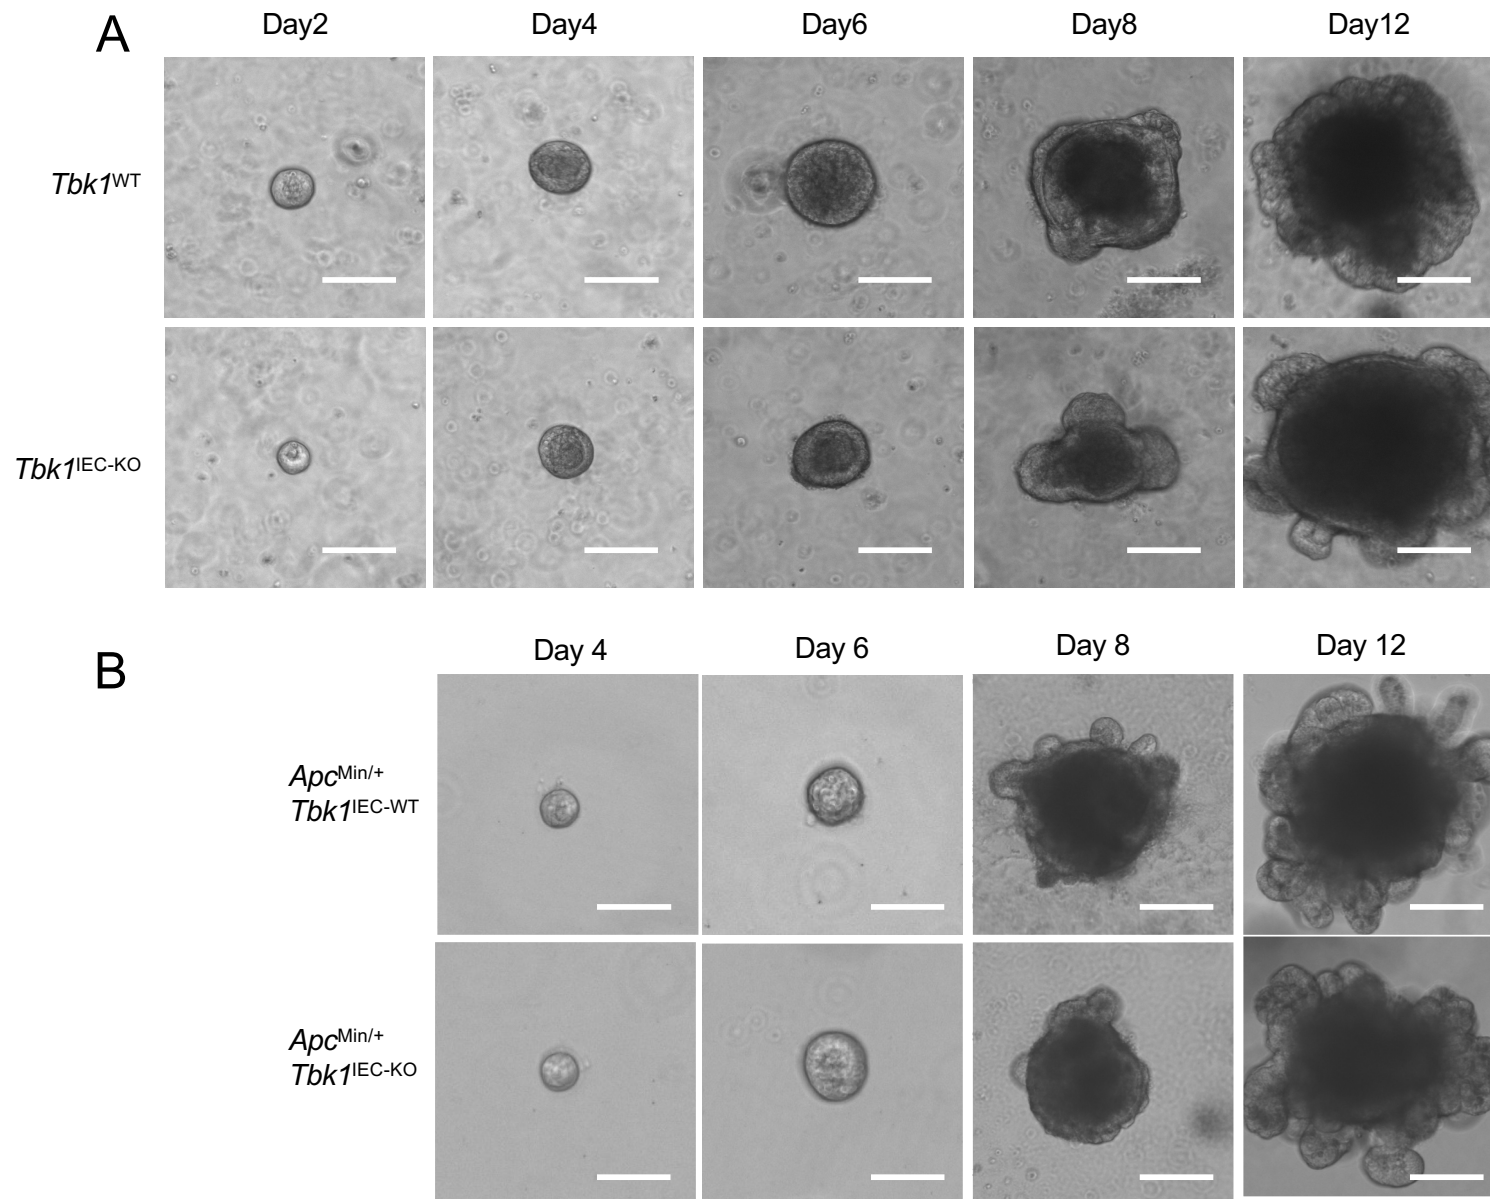

**Supplementary Figure 1.** IEC-specific deletion of TBK1 has no obvious effect on the propagation of intestinal stem cells and tumor cells. (A) Small intestinal organoids derived from 6-week-old *Tbk1*<sup>WT</sup> and *Tbk1*<sup>IEC-KO</sup> mice were monitored for the indicated time points. (B) Small intestinal polyp tumoroids derived from 5-month-old *Apc*<sup>Min/+</sup>*Tbk1*<sup>WT</sup> or *Apc*<sup>Min/+</sup>*Tbk1*<sup>IEC-KO</sup> mice were monitored from growth for the indicated time points. Scale bar = 100  $\mu$ m. Data are representative of 2-3 independent experiments.

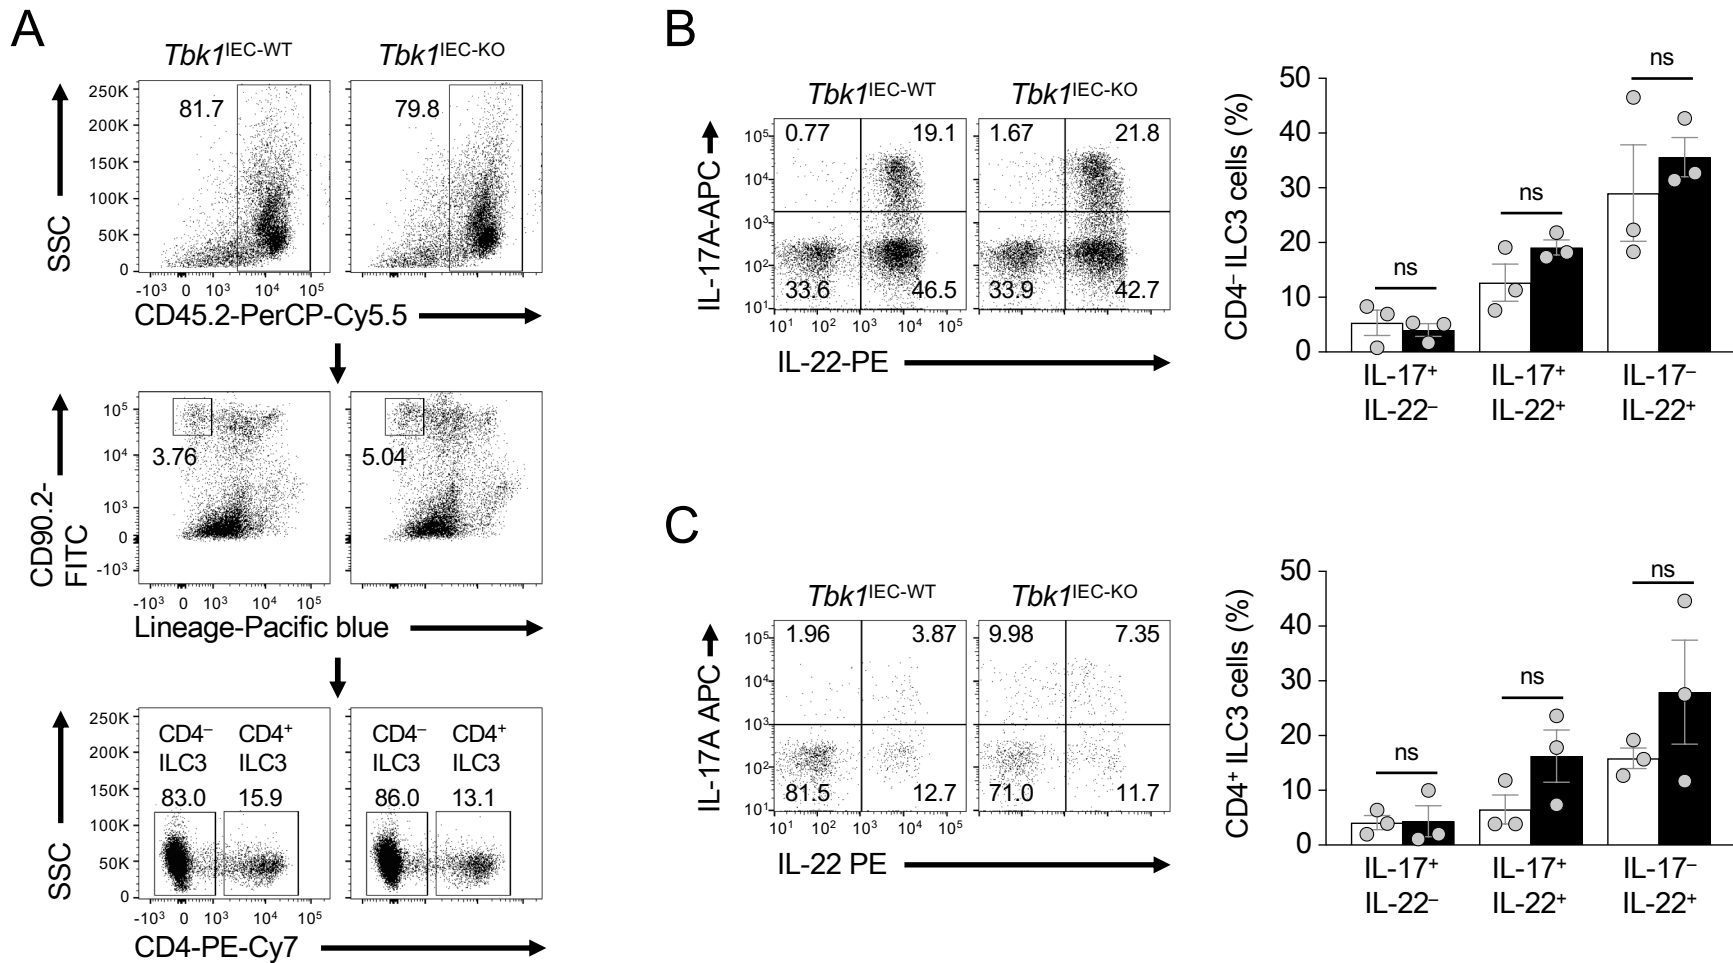

**Supplementary Figure 2.** IEC-specific deletion of TBK1 has no effect on the frequency of lamina propria ILC3s. (A) Gating strategy for flow cytometric analysis of CD4<sup>-</sup> and CD4<sup>+</sup> ILC3 populations. (B and C). Flow cytometric analysis of CD4<sup>-</sup> (B) and CD4<sup>+</sup> (C) ILC3 populations in small intestinal lamina propria of 6-week-old *Tbk1*<sup>IEC-WT</sup> and *Tbk1*<sup>IEC-KO</sup> mice (n = 3 each). Data are presented as representative FACS plots (left) and summary graphs (right, each circle represents a mouse). Data are representative of 2 independent experiments. Summary data are mean ± s.e.m. with P values being determined by unpaired two-tailed Student's *t*-test. ns, not significant.

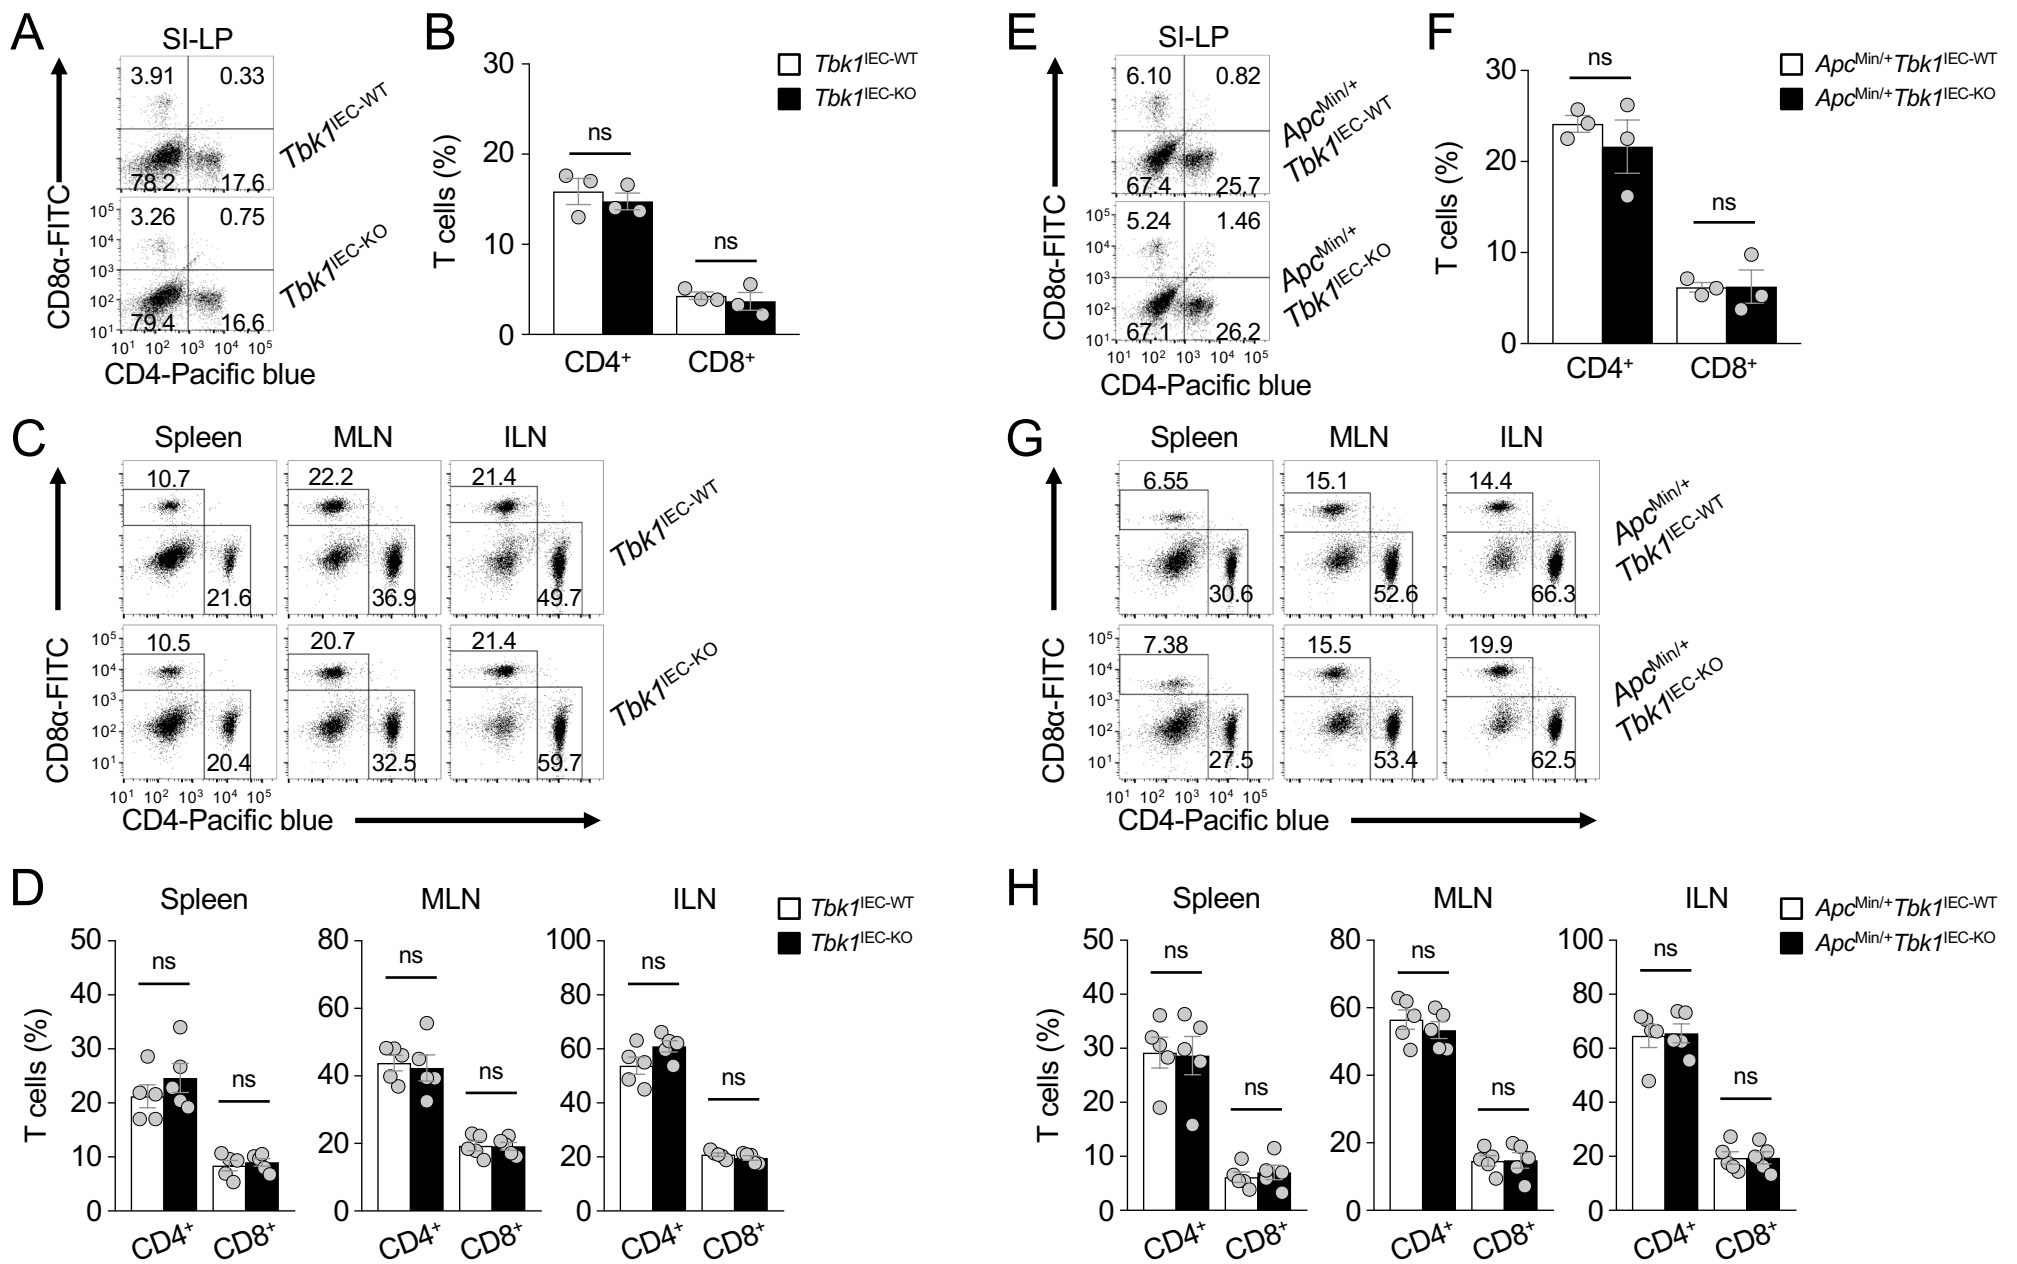

**Supplementary Figure 3.** IEC-specific TBK1 deficiency does not affect T cell homeostasis. (A-D) Flow cytometric analysis of CD4<sup>+</sup> and CD8<sup>+</sup> T cells in lymphocytes of small intestine-lamina propria (SI-LP) (A and B, n = 3) and the indicated lymphoid organs: spleen, mesenteric lymph node (MLN), and inguinal lymph node (ILN) (C and D, n = 5) of 6-week-old *Tbk1*<sup>IEC-WT</sup> and *Tbk1*<sup>IEC-KO</sup> mice. Data are presented as a representative FACS plot (A and C) or summary graphs (B and D). (E-H) Flow cytometric analysis of CD4<sup>+</sup> and CD8<sup>+</sup> T cells in lymphocytes of SI-LP (E and F, n = 3) and the indicated lymphoid organs (G and H, n = 5) of 5-month-old *Apc*<sup>Min/+</sup> *Tbk1*<sup>IEC-WT</sup> and *Apc*<sup>Min/+</sup> *Tbk1*<sup>IEC-KO</sup> mice. Data are presented as a representative FACS plot (E and G) or summary graphs (F and H). Data are representative of 2 (A-B and E-F) or 3 (C-D and G-H) independent experiments, and summary data are mean ± s.e.m. with P values being determined by unpaired two-tailed Student's *t*-test. ns, not significant.

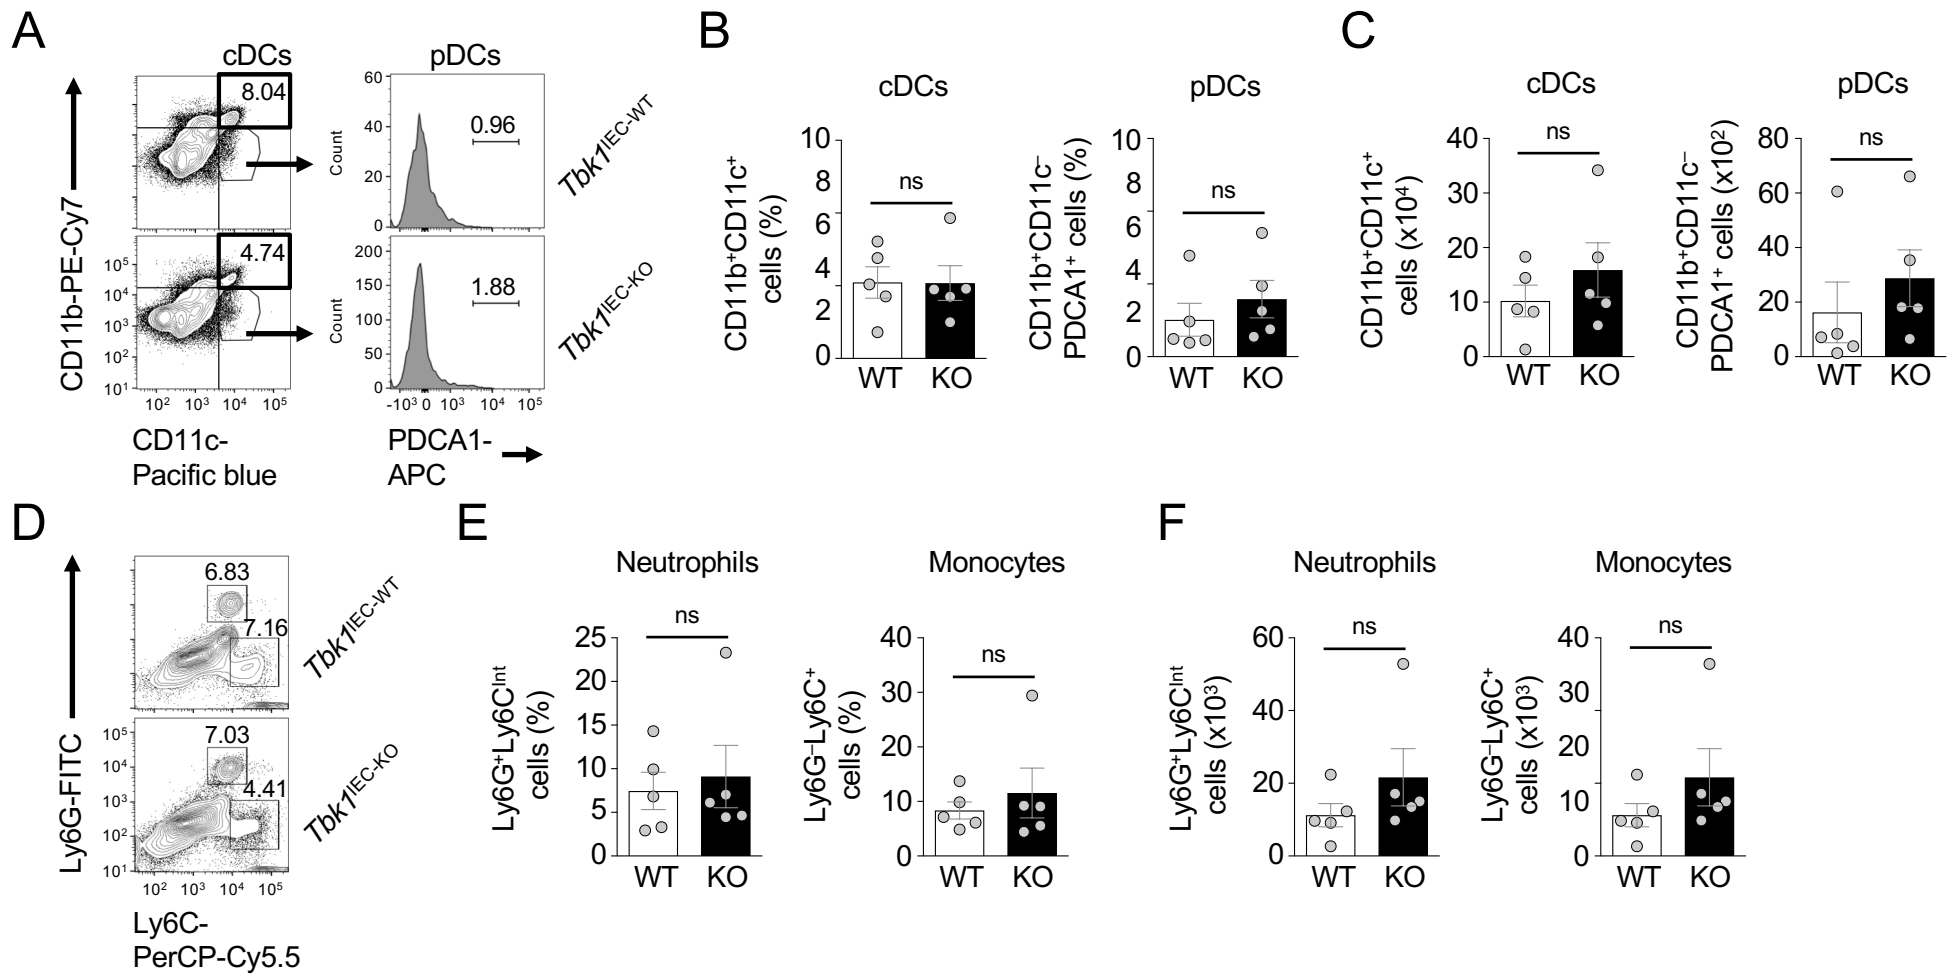

**Supplementary Figure 4.** IEC-specific TBK1 deficiency does not alter the frequency of intestinal innate immune cells. (A-C) Flow cytometric analysis of the frequency (A and B) and absolute number (C) of conventional dendritic cells (cDCs) and plasmacytoid DCs (pDCs) in the lamina propria of 6-week-old *Tbk1<sup>IEC-WT</sup>* and *Tbk1<sup>IEC-KO</sup>* mice (n = 5 each). Data are presented as a representative FACS plot (A) and summary graphs (B and C; each circle represents a mouse). (D-F) Flow cytometric analysis of the frequency (D and E) and absolute number (F) of neutrophils and monocytes in the lamina propria of 6-week-old *Tbk1<sup>IEC-WT</sup>* and *Tbk1<sup>IEC-KO</sup>* mice (n = 5 each). Data are presented as a representative FACS plot (D) and summary graphs (E and F). Data are representative of 3 independent experiments, and summary data are mean  $\pm$  s.e.m. with *P* values being determined by two-tailed Student's *t*-test. ns, not significant.



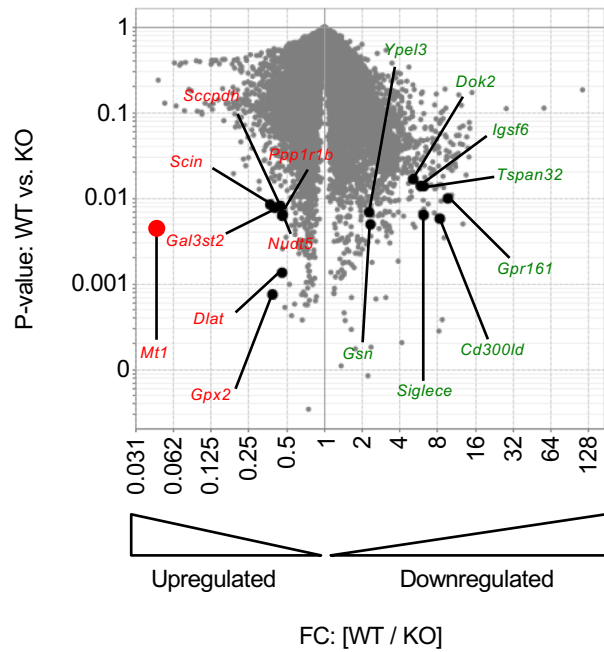

**Supplementary Figure 5.** RNA sequencing analysis of TBK1-regulated gene expression in IECs. RNA sequencing was performed using primary IECs of *Tbk1*<sup>IEC-WT</sup> and *Tbk1*<sup>IEC-KO</sup> mice (n = 3 per genotype), and up- and down-regulated genes are shown in a volcano plot. Genes included in the heatmap of Fig. 6A are indicated.

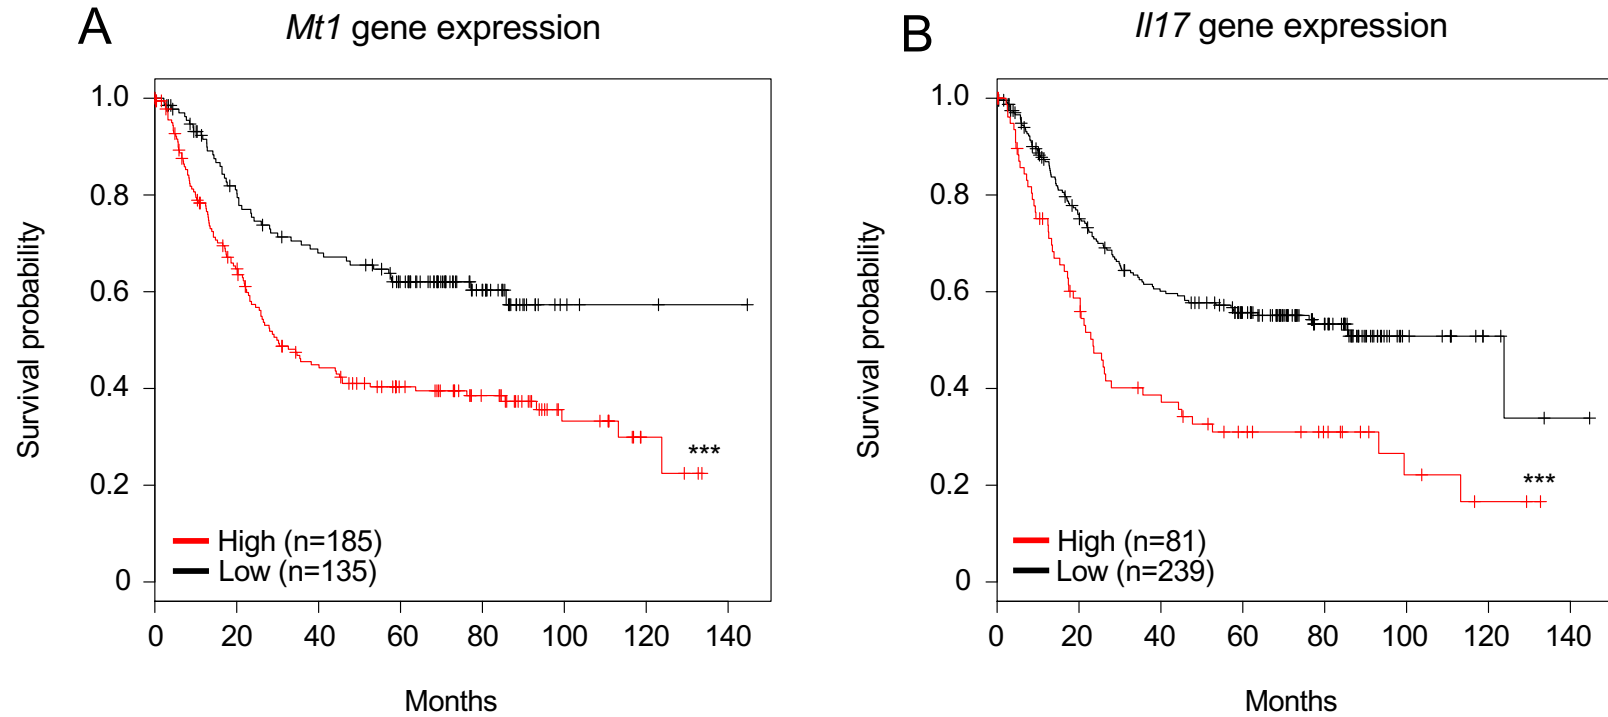

**Supplementary Figure 6.** Association of *Mt1* and *Il17* expression with colorectal cancer patient survival. Kaplan-Meier plots of TCGA database analysis (using UCSC Xena software) showing the association of high expression of *Mt1* (A) and *Il17* (B) with significantly reduced survival of colorectal cancer patients (n = 320).

**Table S1. Gene-specific primers for genotyping**

| <b>Gene Name</b>  | <b>Primer Sequence</b>                                                                                                                |
|-------------------|---------------------------------------------------------------------------------------------------------------------------------------|
| <i>Tbk1</i>       | Forward 5'- GCCAGATATCCCTGTA ACTCACC -3'<br>Reverse 5'- CAGATGGTTGGAGGTGCTCTGCAT -3'                                                  |
| <i>Apc</i>        | Wild-type primer 5'- GCCATCCCTTCAAGTTAG -3'<br>Common primer 5'- TTCCA CTTTGGCATAAGGC -3'<br>Min primer 5'- TTCTGAGAAAGACAGAAGTTA -3' |
| <i>Villin-Cre</i> | Forward 5'- CATGTCCATCAGGTTCTTGC -3'<br>Reverse 5'- TTCTCCTCTAGGCTCGTCCA -3'                                                          |
| <i>Mt1</i>        | Forward 5'- TCACCAGATCTCGGAATGG -3'<br>Reverse 5'- AAGAACCGGAATGAATCGC -3'                                                            |
| <i>Mt2</i>        | Forward 5'- CGCGCTCACTGACTGCCTTC -3'<br>Reverse 5'- CTGGGAGCACTTCGCACAGC -3'                                                          |

**Table S2. Gene-specific primers for qRT-PCR**

| <b>Gene Name</b>  | <b>Primer Sequence</b>                                                                |
|-------------------|---------------------------------------------------------------------------------------|
| <i>Il17a</i>      | Forward 5'- AGCGATGGTGGATGGCTCATGGTTAG -3'<br>Reverse 5'- AGCTTCCCTCCGCATTGACACAG -3' |
| <i>Il1β</i>       | Forward 5'- GGAGAACCAAGCAACGACAAAATA -3'<br>Reverse 5'- TGGGGA ACTCTGCAGACTCAAAC -3'  |
| <i>Il23</i>       | Forward 5'- CGTATCCAGTGTGAAGATGGTT -3'<br>Reverse 5'- CTATCAGGGAGTAGAGCAGGCT -3'      |
| <i>Il22</i>       | Forward 5'- ATGAGTTTTTCCCTTATGGGGAC -3'<br>Reverse 5'- GCTGGAAGTTGGACACCTCAA -3'      |
| <i>Il6</i>        | Forward 5'- TGAACAACGATGATGCACTTGC -3'<br>Reverse 5'- GCTATGGTACTCCAGAAGACC -3'       |
| <i>Il21</i>       | Forward 5'- ATCCTGAACTTCTATCAGCTCCAC -3'<br>Reverse 5'- GCATTTAGCTATGTGCTTCTGTTTC -3' |
| <i>Il10</i>       | Forward 5'- CCAGAGCCACATGCTCCTAGA -3'<br>Reverse 5'- GGTCCCTTTGTTTCAAAGAAAGTCTTC -3'  |
| <i>E-cadherin</i> | Forward 5'- CACCTGGAGAGAGGCCATGT -3'<br>Reverse 5'- TGGGAAACATGAGCAGCTCT -3'          |
| <i>Claudin-2</i>  | Forward 5'- TATGTTGGTGCCAGCATTGT -3'<br>Reverse 5'- TCATGCCACCACAGAGATA -3'           |
| <i>Occludin</i>   | Forward 5'- CCTCCAATGGCAAAGTGAAT -3'<br>Reverse 5'- CTCCCCACCTGTCGTGTAGT -3'          |
| <i>ZO-1</i>       | Forward 5'- CCACCTCTGTCCAGCTCTTC -3'<br>Reverse 5'- CACCGGAGTGATGGTTTTCT -3'          |
| <i>Mt1</i>        | Forward 5'- AAGAGTGAGTTGGGACACCTT -3'<br>Reverse 5'- CGAGACAATACAATGGCCTCC -3'        |
| <i>Actin</i>      | Forward 5'- CGTGAAAAGATGACCCAGATCA -3'<br>Reverse 5'- CACAGCCTGGATGGCTACGT -3'        |
